1 **Full title:**

2 Increased juvenile survival may not be universally linked to longevity: ecological, social and life-history  
3 drivers of age-specific mortality in birds

4

5 **Authors:**

6 Emeline Mourocq<sup>1\*</sup>, [emeline.mourocq@laposte.net](mailto:emeline.mourocq@laposte.net)

7 Szymon M. Drobniak<sup>2,3</sup>, [szymek.drobniak@uj.edu.pl](mailto:szymek.drobniak@uj.edu.pl)

8 Michael Griesser<sup>1,4</sup>, [michael.griesser@gmail.com](mailto:michael.griesser@gmail.com)

9

10 **Authors Affiliations:**

11

12 <sup>1</sup>*University of Zurich, Department of Anthropology, University of Zurich, Zurich, Switzerland*

13 <sup>2</sup>*Institute of Environmental Sciences, Jagiellonian University, Kraków, Poland*

14 <sup>3</sup>*School of Biological, Environmental and Earth Sciences, University of New South Wales, Sydney,  
15 Australia*

16 <sup>4</sup>*State Key Laboratory of Biocontrol, Department of Ecology and School of Life Sciences, Sun Yat-sen  
17 University, Guangzhou, 510275, China*

18

19 **\*Corresponding author:**

20 Name: Emeline Mourocq

21 Address: calle Vela y Mora 43 2ºIz, 11660 Prado del Rey (Cadiz, Spain)

22 Phone: +34692186305

23 e-mail: [emeline.mourocq@laposte.net](mailto:emeline.mourocq@laposte.net)

24 **Short title:**

25 Juvenile survival-longevity relationship

## 26 Abstract

27 A classical prediction of the traditional evolutionary theories of ageing (tETA) is that longevity should  
28 be positively correlated with survival early on in life. However, large and unexplained variation exists  
29 in juvenile survival-longevity combinations. Here, we provide the first comparative study  
30 investigating the life-history, ecological and social correlates of juvenile survival, longevity and their  
31 combinations in 204 bird species. Overall, both measurements were positively correlated, but  
32 multiple survival-longevity combinations evolved, some in accordance with tETA (“positive JS-L  
33 combinations”) while others contrasting it (“JS-L mismatches”). Positive JS-L combinations covaried  
34 with the pace of life proxies, whereas mismatching combinations covaried with the growing season  
35 length, where long growing seasons promoted juvenile survival, while short growing seasons  
36 promoted longevity. Interestingly, sociality explained only positive combinations, while life-history  
37 and ecological traits explained both positive and mismatching combinations. Overall, these findings  
38 challenge a main prediction of the tETA, and identify key evolutionary forces driving the coevolution  
39 between juvenile survival and longevity.

### 40 Key words:

41 Comparative study, ecology, evolutionary theories of ageing, first-year survival, juvenile survival, life-  
42 history evolution, maximum longevity, social system.

43 Traditional theories of aging (tETA: "mutation accumulation"<sup>1</sup>, "antagonistic pleiotropy"<sup>2</sup>,  
44 "antagonistic pleiotropy"<sup>3</sup>) propose that extrinsic mortality is the main driver of longevity<sup>4,5</sup>. They  
45 predict that higher extrinsic mortality early on in life leads to relatively few individuals reaching old  
46 age, and the fitness value of prolonged lifespan is therefore small in such cases. Thus, selection to  
47 extend longevity is only strong in populations with high survival early on in life (juvenile survival  
48 henceforth). Accordingly, these theories predict that longevity should be positively correlated with  
49 juvenile survival<sup>2,4,6-8</sup>.

50 Although this classical prediction of tETA underlies many life-history studies, and is  
51 commonly cited as being largely corroborated by existing data<sup>9,10</sup>, support has been mixed and  
52 alternative theories exist<sup>5,11-13</sup>. Moreover, recent theoretical and empirical studies do challenge this  
53 prediction<sup>9,14-16</sup>, and state that juvenile survival (extrinsic mortality early on in life) is not a random  
54 process but does depend on age, individual condition, or population density. Accordingly, species  
55 can deviate from the expected relationship between juvenile survival and longevity, by having a low  
56 juvenile survival but being long-lived, or by having a high juvenile survival but being short-lived<sup>5,9,13-</sup>  
57 <sup>17</sup>. However, it remains unclear whether these deviations represent evolved strategies modulated by  
58 specific life-history, ecological and/or social factors, or whether they are pieces of a continuum of  
59 randomly varying combinations.

60 Longevity is a pivotal factor shaping life-histories<sup>18,19</sup>, but survival can vary among the stages  
61 of life and differently influence the evolution of life-history traits<sup>20-22</sup>. Theoretical<sup>12,23-26</sup> and empirical  
62 work on birds<sup>27</sup>, fishes<sup>22</sup> and mammals<sup>28</sup> have highlighted the importance of considering age-specific  
63 survival to understand the evolution of life-history traits. Specifically, these studies showed that age-  
64 specific survival patterns that deviate from the classical prediction of tETA (e.g., low chance of  
65 survival early in life but a high longevity), are linked to unusual combinations of life-history traits that  
66 are characteristic to both slow- and fast-living animals<sup>19</sup>. For instance, turtles and crocodiles suffer  
67 from high juvenile mortality, and accordingly females lay many eggs in each reproductive event (like

68 fast-living animals) despite that they are exceptionally long-lived (like slow-living animals)<sup>29</sup>. Thus,  
69 considering the factors affecting age-specific survivals and their combination is critical to understand  
70 life history evolution in general.

71 Longevity varies considerably across species. In vertebrates it ranges from a few months to  
72 over 100 years<sup>30</sup>. Comparative work did show that adaptations that reduce extrinsic mortality,  
73 including protective shells<sup>6</sup> or the ability to fly<sup>31</sup>, are linked with increased longevity. Moreover, long-  
74 lived species tend to be active during the period of day with the lowest predation risk<sup>31</sup>, have a low  
75 number of co-occurring predators of adults<sup>32</sup> or life-history traits characteristic of a slow pace of life  
76 (e.g., produce few offspring, which develop slowly and mature relatively late in life)<sup>12,18</sup>. Additionally,  
77 larger mammals and birds live longer than smaller ones<sup>32-34</sup>.

78 In many taxa, juveniles usually have lower and more variable survival than adults<sup>35-38</sup>. The  
79 few studies investigating juvenile survival showed that the small body size of juveniles may explain  
80 their low survival in lineages with slow growth (mammals, reptiles) and indeterminate growth  
81 (fish)<sup>39,40</sup>. In lineages with rapid body growth (birds), low juvenile survival can reflect age-dependent  
82 social dominance<sup>35</sup> or lacking skills<sup>41</sup>. Besides, juvenile survival tends to be high in birds with long  
83 nestling periods<sup>42</sup>, low reproductive allocation<sup>43,44</sup>, prolonged post-fledging care<sup>45</sup>, or prolonged  
84 association with the parents beyond independence (i.e., family-living species, see<sup>46</sup>)<sup>47,48</sup> (Table 1).  
85 Although a number of studies have investigated inter-specific variation in longevity<sup>31,32,34,49,50</sup>, it is  
86 unknown which factors influence survival early on in life and how this relates to longevity<sup>51</sup>.  
87 Importantly, comparative studies are lacking.

88 Here, we use phylogenetic comparative analyses to understand interspecific variation in  
89 juvenile survival (measured as post-fledglings to first-year survival rate) and maximum longevity, as  
90 well as their relationship, in 204 bird species. Firstly, we compare the association of (i) juvenile  
91 survival and (ii) maximum longevity with life-history, ecological and social parameters. Secondly, we  
92 investigate how juvenile survival and maximum longevity relate to each other, and assess which life-

93 history, ecology and social traits better explain (i) positive associations between juvenile survival and  
 94 longevity (i.e., as expected by the classical prediction of tETA: low-low and high-high combinations,  
 95 referred to as “positive JS-L combinations” henceforth), and (ii) mismatches between juvenile  
 96 survival and longevity (i.e., deviation from the classical prediction of tETA: low-high and high-low  
 97 combinations, referred to as “JS-L mismatches” henceforth).

98 **Table 1 | Description and prediction of the parameters investigated in this study.**

|              | <b>parameter's name</b>     | <b>description</b>                                                                                                                                                                                              | <b>prediction</b>                                                                                                                                                                                                                                             | <b>source prediction</b> |
|--------------|-----------------------------|-----------------------------------------------------------------------------------------------------------------------------------------------------------------------------------------------------------------|---------------------------------------------------------------------------------------------------------------------------------------------------------------------------------------------------------------------------------------------------------------|--------------------------|
| life-history | adult body mass*            | mean adult body mass (g)                                                                                                                                                                                        | larger body size confers better ability to cope with temporary food shortages, climatic fluctuations and extreme weather than smaller body size; large body size may associate with higher juvenile survival and higher longevity                             | 39,52                    |
|              | incubation period*          | number of days from laying to hatching                                                                                                                                                                          | longer incubation period may associate with higher juvenile survival and higher longevity                                                                                                                                                                     | 12,18                    |
|              | nestling period*            | number of days from hatching to fledging                                                                                                                                                                        | longer nestling period may associate with higher juvenile survival and higher longevity                                                                                                                                                                       | 42                       |
|              | annual parental investment* | body-mass scaled annual reproductive investment (total mass of eggs produced annually divided by adult body mass) <sup>(a)</sup>                                                                                | higher parental investment may associate with lower juvenile survival and lower longevity                                                                                                                                                                     | 12,18,53                 |
|              | chick development mode      | precocial vs. non precocial; semi-altricial or semi precocial species were categorised as non precocial                                                                                                         | precocial species should have lower juvenile survival but higher longevity because of lower parental care after hatching while the opposite is expected for altricial species                                                                                 | 54                       |
|              | sedentariness               | resident vs. migratory; based on the species maximum movement; sedentary species or with local movement were categorised as resident and the one with regional or inter-continental movement as migratory       | costs associated with migration could translate into lower juvenile survival and lower longevity in migratory than in non-migratory species                                                                                                                   | 55                       |
| ecological   | period of activity          | diurnal vs. nocturnal; crepuscular species (i.e. active at dawn and dusk) were categorised as nocturnal                                                                                                         | species that are active at night are likely to be harder for predators to detect and predators are more scarce at night thus, nocturnal species might have higher juvenile survival and live longer than diurnal species                                      | 31                       |
|              | nest predation risk*        | based on both most commonly used nest location and nest type; ordinally ranked: 1 = inaccessible nests in cavities, 2 = open nests in cliffs or tree, 3 = open nest in shrub-layer or the ground <sup>(b)</sup> | nest predation risk may alter the developmental phase of the nestling and the reproductive effort of the parents which may affect juvenile survival and longevity; greater nest predation risk may associate with lower juvenile survival and lower longevity | 20                       |
|              | foraging exposure*          | level of exposure to predators during foraging time based on most commonly used foraging area; ordinally ranked: 1 = pelagic species, 2 = aerial foragers, 3 = terrestrial foragers                             | pelagic or aerial forager should have lower predation risk and be more capable of escaping from predators than species that feed on the ground; juvenile survival and longevity may be reduced in the latter more than in the formers                         | 56,57                    |
|              | vegetation cover*           | cover of woody vegetation in habitat (%)                                                                                                                                                                        | more open habitats provide less visual cover than habitats dense in vegetation, increasing the risk of being killed; thus, low vegetation density may associate with lower juvenile survival and lower longevity. The reverse may be true if vegetation       | 57-59                    |

|                          |                                                                                                                                                                                                                                                            |                                                                                                                                                                                                                                                                                                                              |                                                                                                                                                                                                                                           |                   |
|--------------------------|------------------------------------------------------------------------------------------------------------------------------------------------------------------------------------------------------------------------------------------------------------|------------------------------------------------------------------------------------------------------------------------------------------------------------------------------------------------------------------------------------------------------------------------------------------------------------------------------|-------------------------------------------------------------------------------------------------------------------------------------------------------------------------------------------------------------------------------------------|-------------------|
|                          |                                                                                                                                                                                                                                                            | cover, by obstructing the view of the prey, affects its survival                                                                                                                                                                                                                                                             |                                                                                                                                                                                                                                           |                   |
| caloric content of food* | energy content of the food in kcal/100g <sup>(c)</sup>                                                                                                                                                                                                     | food calory content can influence the energy available for maintenance; high calory diet may associate with higher juvenile survival and higher longevity                                                                                                                                                                    | 60,61                                                                                                                                                                                                                                     |                   |
| fibre content of food*   | fibre food content in g/100g <sup>(c)</sup>                                                                                                                                                                                                                | food fibre content can influence digestion efficiency and thus the level of resource acquired and health; high fibre diet may associate with higher juvenile survival and higher longevity                                                                                                                                   | 60,61                                                                                                                                                                                                                                     |                   |
| foraging cost*           | level of energy demand for foraging based on most commonly used foraging technics; ordinally ranked: 1 = sit and wait hunters, 2 = swimming or short perch & short flights, 3 = aerial or under water foraging, 4 = terrestrial or gleaners <sup>(d)</sup> | species with highly energetically demanding foraging strategies may have lower juvenile survival and lower longevity than species with less energetically demanding technics                                                                                                                                                 | 62                                                                                                                                                                                                                                        |                   |
| diet specialisation      | specialist (only one diet class) vs. generalist (more than one diet class)                                                                                                                                                                                 | a change in the food availability can have higher costs for specialist than generalist species as the later can deviate to other food resources; specialisation may associate with lower juvenile survival and lower longevity                                                                                               | 63                                                                                                                                                                                                                                        |                   |
| habitat specialisation   | specialist (only one habitat type) vs. generalist (more than one habitat type) <sup>(e)</sup>                                                                                                                                                              | a change in habitat availability can have higher costs for specialist than generalist species as the latter can occupy other habitat types; specialisation is predicted to associate with lower juvenile survival and lower longevity                                                                                        | 64,65                                                                                                                                                                                                                                     |                   |
| MGS duration*            | mean duration of the growing season in months <sup>(f)</sup> (i.e., month(s) of the yeuyuar in which temperature and rainfall allow significant plant productivity)                                                                                        | a short growing season implies changes in environmental conditions over the year, thus MGS duration can be seen as a proxy of environemental variability; less variable environments (long growing season) may associate with higher juvenile survival and longevity than highly variable environment (short growing season) | 66                                                                                                                                                                                                                                        |                   |
| region                   | breeding distribution range: northern or southern hemisphere, both hemispheres, island                                                                                                                                                                     | southern hemisphere and island species may have higher juvenile survival and higher longevity compared to northern hemisphere species                                                                                                                                                                                        | 34,66,67                                                                                                                                                                                                                                  |                   |
| N avian predators*       | number of sympatric adult's or independent juveniles' predator species <sup>(g)</sup>                                                                                                                                                                      | a higher number of predators increases the risk of being predated; higher number of predators may associate with a lower juvenile survival and lower longevity                                                                                                                                                               | 32                                                                                                                                                                                                                                        |                   |
| Social                   | parental care mode                                                                                                                                                                                                                                         | uniparental, biparental, cooperative breeding                                                                                                                                                                                                                                                                                | the presence of additional carer can reduce survival risks on young and survival costs on the other carer(s); biparental and cooperative breeding species may have higher juvenile survival and higher longevity than uniparental species | 68, but see 69,70 |
|                          | social system                                                                                                                                                                                                                                              | family living (offspring remain at least 50 days beyond nutritional independence with parents) vs. non-family living <sup>(h)</sup>                                                                                                                                                                                          | species with prolonged post-fledging parental care or having a prolonged association with the parents beyond independence, as in family-living species, may have higher juvenile survival and lower longevity                             | 45,71             |

99 Because experience (e.g., foraging, competition, reproductive strategies, anti-predation behaviours)  
 100 differs between young individuals (inexperienced) and adults (experienced), we also assumed each of  
 101 the abovementioned parameters to diferentially influence juvenile survival and longevity, and  
 102 potentially explain variation in juvenile survival/longevity relationships.

103 \* Included in the PCA (Table 2). The other parameters are categorical variables. (a)<sup>56</sup>,  
 104 (b)<sup>72,73</sup>, (c)<sup>60</sup>, (d)<sup>74</sup>, (e)<sup>75</sup>, (f)<sup>76</sup>, (g)<sup>32</sup>, (h)<sup>46</sup>.

## 105 Materials and Methods

106 **Survival data.** We collected data on juvenile survival and maximum longevity for 293 bird species  
107 covering 20 taxonomic orders and 74 families (Fig. S1 in Supporting Information), using existing  
108 datasets<sup>32</sup>, the Handbook of the Birds of the World<sup>77</sup>, the Birds of North America<sup>78</sup>, the Handbook of  
109 Australian, New Zealand and Antarctic Birds<sup>79</sup>, the Handbook of Southern Africa<sup>80</sup>, the Australian  
110 Birds and Bats Banding Scheme database<sup>81</sup> and Animal Ageing and Longevity database<sup>82</sup> (available at  
111 <http://genomics.senescence.info/species/>).

112 Juvenile survival was assessed as the proportion of fledglings that survive their first year of  
113 life, where many juveniles die due to extrinsic mortality<sup>83</sup>. For species where multiple values of  
114 juvenile survival were available we used their mean. Maximum longevity (maximum observed  
115 lifespan) was mostly assessed with mark-recapture of ringed wild birds, but for 19 species longevity  
116 was of unknown origin (captivity or wild). Earlier studies showed that longevity records in captivity  
117 and the wild are highly correlated<sup>32,34</sup> and thus, we also included longevity data of unknown origin.  
118 Longevity estimates are influenced by the sampling effort because the larger the sample the higher  
119 is the chance to sample a long-lived individual<sup>32</sup>. Therefore, to adjust for any bias associated with  
120 maximum longevity estimates we included the independent number of Web of Science records per  
121 species (research effort) as a covariate in our analyses (available at  
122 <http://apps.webofknowledge.com>).

123 **Life-history, ecology and social parameters.** We used a published dataset<sup>84</sup> that was  
124 complemented with data from the sources listed above, and compiled data on life-history, ecological  
125 and social parameters that may influence juvenile survival and longevity (Table 1). We could find  
126 data for the 20 parameters listed in Table 1 for 204 of the 293 species (Fig. S2). Thus, 293 species  
127 were considered in descriptive analyses, while a subset 204 species entered detailed phylogenetic  
128 mixed models.

129 **Statistical analyses.** *General procedures.* All statistical analyses were performed in R version  
130 3.2.2<sup>85</sup>. We used phylogenetic controlled mixed models in ASReml-R 3<sup>86</sup> to control for the  
131 phylogenetic dependency among species (VSN International, Hempstead, U.K.<sup>87</sup>). We included  
132 phylogeny as a random effect in the model in the form of a correlation matrix of distances from the  
133 root of the tree to the most recent common ancestor between two species. We tested the  
134 phylogenetic effect with a likelihood ratio test where 2 times the difference in log-likelihood  
135 between the model with and without the phylogeny is tested against a  $\chi^2$  distribution with one  
136 degree of freedom<sup>88</sup>. To account for phylogenetic uncertainty, all ASReml-R models were run with  
137 300 different phylogenetic trees obtained from [www.birdtree.org](http://www.birdtree.org)<sup>89</sup>. We averaged the estimates  
138 from the 300 models and present the averaged estimates and the  $F_{S_{300}}$  (proportion of trees for  
139 which the p-value associated with an estimate was  $<0.05$ ). Individual p-values were obtained  
140 through a conditional Wald F-test. All continuous variables were standardised by centring (around  
141 the mean) and scaling (by the standard deviation) them, to allow direct comparison of the model  
142 estimates<sup>90</sup>, but we present raw data in the figures. We checked for the assumptions of normally  
143 distributed and homogeneous residuals by visually inspecting histograms and qq-plots of the  
144 residuals as well as residuals plotted against fitted values.

145         To reduce the multidimensionality of our predictor variables and to reduce their  
146 collinearity<sup>91</sup>, we performed a principal component analysis (PCA) with varimax rotation including all  
147 12 continuous predictors, and extracted 7 PC's given in Table 2. Prior to the PCA, the distribution of  
148 these predictors was checked graphically and, if necessary, transformed to obtain a more  
149 symmetrical distribution, and then standardised (see above).



150 Table 2 | Results of the Principal Component Analysis (PCA) with varimax rotation on the 12 continuous predictors.

| category                          | transformation | variable                   | n° component | life-        | exposure    | food         | nest        | N           | avian       | foraging    | MGS  | h2 |
|-----------------------------------|----------------|----------------------------|--------------|--------------|-------------|--------------|-------------|-------------|-------------|-------------|------|----|
|                                   |                |                            |              | history      | to          | fibre        | predation   | avian       | cost        | duration    |      |    |
|                                   |                |                            |              | pace         | predators   |              | risk        | predators   |             |             |      |    |
| life-history                      | ln             | adult body mass            |              | <b>0.90</b>  | -0.25       | -0.08        | 0.13        | -0.01       | -0.17       | -0.12       | 0.95 |    |
|                                   | none           | annual parental investment |              | <b>-0.89</b> | 0.14        | -0.17        | 0.13        | 0.14        | -0.05       | -0.02       | 0.87 |    |
|                                   | sqrt           | incubation period          |              | <b>0.76</b>  | -0.35       | 0.23         | -0.03       | -0.10       | -0.28       | -0.04       | 0.84 |    |
|                                   | none           | nestling period            |              | 0.51         | 0.04        | 0.44         | -0.58       | -0.13       | 0.01        | 0.20        | 0.85 |    |
| ecological                        | none           | nest predation risk        |              | 0.05         | -0.10       | -0.12        | <b>0.94</b> | -0.12       | 0.09        | -0.07       | 0.93 |    |
|                                   | none           | foraging cost              |              | -0.17        | 0.02        | -0.11        | 0.08        | -0.07       | <b>0.96</b> | -0.05       | 0.98 |    |
|                                   | none           | calorie content of food    |              | 0.15         | 0.49        | 0.62         | 0.02        | 0.44        | 0.01        | -0.01       | 0.83 |    |
|                                   | ln             | fibre content of food      |              | -0.11        | 0.16        | <b>-0.89</b> | 0.22        | -0.01       | 0.15        | -0.10       | 0.92 |    |
|                                   | none           | foraging exposure          |              | -0.30        | <b>0.86</b> | -0.04        | -0.01       | 0.04        | -0.02       | 0.00        | 0.83 |    |
|                                   | sqrt           | vegetation cover           |              | -0.21        | <b>0.85</b> | -0.01        | -0.13       | -0.08       | 0.05        | 0.11        | 0.80 |    |
|                                   | sqrt           | N avian predators          |              | -0.18        | -0.03       | 0.08         | -0.07       | <b>0.95</b> | -0.05       | 0.00        | 0.95 |    |
|                                   | none           | MGS duration               |              | -0.06        | 0.08        | 0.08         | -0.11       | -0.01       | -0.05       | <b>0.98</b> | 0.99 |    |
| SS loadings                       |                |                            |              | 2.68         | 1.94        | 1.5          | 1.34        | 1.15        | 1.07        | 1.05        |      |    |
| cumulative variance explained (%) |                |                            |              | 22           | 39          | 51           | 62          | 72          | 81          | 89          |      |    |

151 We considered coefficients of correlation greater than 0.7 or less than -0.7 to be high loadings (highlighted in bold). h2 is the communality of the 7  
 152 components. ln: natural logarithm, sqrt : Square root

153 Full mixed models included the 7 PC's (Table 2), the 8 categorical variables described in Table  
154 1, and as covariates research effort (log transformed) and body mass (log transformed) to control for  
155 allometry<sup>32,49</sup>. Since the life-history pace PC was loaded by adult body mass (Table 2) and therefore  
156 partially controlling for allometry, we only included the residuals from a linear model between the  
157 natural logarithm of adult body mass and the life-history pace component as body-mass covariate.  
158 This way the presence in the model of both the life-history pace PC and the residual body mass  
159 allows to fully control for allometry.

160 The importance of first-year survival for fitness benefits is likely to depend on the age at first  
161 reproduction (AFR) (63.8% of the species had an AFR  $\leq$  1 year old, 17% ]1; 2], 9.6% ]2; 3] and 9.6% >  
162 3 years old, Fig. S3). Therefore, we re-ran the PCA and all the following analyses on a subset of  
163 species for which AFR was available (N=188, Fig. S4). PCA output remained the same, and AFR  
164 loaded positively on the life-history pace PC (Table S1). The linear mixed-effects models gave  
165 qualitatively similar output (Tables S2, S3, S4) suggesting that in our set of species it is unlikely that  
166 AFR affected our analyses, and thus we present in the manuscript the analyses including all species  
167 (N=204).

168 *Correlates of juvenile survival and longevity.* We ran two phylogenetically controlled linear mixed-  
169 effects models including the same life-history, ecological and social predictors to assess the factors  
170 correlating with juvenile survival and with longevity. We fitted in both cases the full models (i.e., no  
171 model selection applied) to obtain comparable estimates of the same set of predictors in both  
172 models. To compare the influence of each predictor on both response variables, juvenile survival and  
173 longevity were standardised<sup>90</sup>.

174 *Combinations of juvenile survival and longevity.* The second set of analyses assessed factors that  
175 were associated with combinations of juvenile survival and longevity that (i) concurred with (positive  
176 JS-L combinations) or (ii) deviated from (JS-L mismatches) the positive correlation between juvenile  
177 survival and longevity, predicted by tETA. We captured the natural patterns of association between

178 juvenile survival rate and maximum longevity using a PCA approach on the two log-transformed and  
179 standardised survival variables. The PCA resulted in two principal components (PCs, Table S5). Due  
180 to the properties of a PC data rotation, PC1 was loaded positively by both survival estimates (Table  
181 S5). Thus, it describes a tied link between juvenile survival and longevity, capturing patterns that  
182 concur with the classical prediction of tETA (cases positioned on PC1 represent the most typical  
183 cases of positive JS-L combinations). PC2 was loaded positively by juvenile survival rate and  
184 negatively by maximum longevity (Table S5). Being perpendicular to PC1, it captures how much a  
185 species deviates from the overall expected association, and thus, how much it deviates from the  
186 classical prediction of tETA (JS-L mismatches).

187         We ran two separate phylogenetically controlled linear mixed-effects models to assess the  
188 factor associated with absolute values of (i) PC1 (positive JS-L combinations) and (ii) PC2 (JS-L  
189 mismatches). We included the same set of predictors and covariates as in the full models of juvenile  
190 survival and longevity analyses, and included the sign (positive or negative) of the corresponding PC  
191 as a factor and in interaction with each predictor. The latter allowed us to assess the correlates of  
192 each possible combination of juvenile survival and longevity, i.e., to investigate how species  
193 attributes associated with (i) high juvenile survival-high longevity vs. low juvenile survival-low  
194 longevity combinations (positive JS-L combinations, analysis of PC1), and (ii) deviation towards  
195 higher juvenile survival-lower longevity vs. lower juvenile survival-higher longevity (JS-L mismatches,  
196 analysis of PC2). For both models, we used a backward model selection process. We successively  
197 removed terms with  $p > 0.10$ , starting with the highest-order interactions and following with the  
198 simple effects. We compared models including and excluding the focal predictor using *model.sel*  
199 function from the MuMIn package<sup>92</sup>. The decision to exclude the predictor was based on the AICc  
200 criterion using a  $\Delta\text{AICc}$  (i.e.,  $\text{AICc}_{\text{included}} - \text{AICc}_{\text{excluded}}$ )  $> 2$  as threshold<sup>93</sup>. Results of the full models are  
201 provided in Table S6 and S7.

202

203 **Table 3 | Correlates of juvenile survival and longevity.** Results from phylogenetically controlled linear  
 204 mixed-effect models testing the influence of key life-history, ecological and social traits on juvenile  
 205 survival and longevity, respectively.

|                                      |                   | juvenile survival          |                   | longevity           |                   |
|--------------------------------------|-------------------|----------------------------|-------------------|---------------------|-------------------|
|                                      |                   | (first-year survival rate) |                   | (maximum longevity) |                   |
|                                      |                   | estimates*                 | F <sub>S300</sub> | estimates*          | F <sub>S300</sub> |
| (intercept)                          |                   | 0.20                       | 0.02              | <b>-0.70</b>        | <b>1</b>          |
| residual adult body mass (covariate) |                   | -0.02                      | 0                 | 0.03                | 0                 |
| ln (research effort) (covariate)     |                   | <b>-0.14</b>               | <b>1</b>          | <b>0.18</b>         | <b>1</b>          |
| life-history pace PC                 |                   | <b>0.50</b>                | <b>1</b>          | <b>0.42</b>         | <b>1</b>          |
| nest predation risk PC               |                   | <b>0.19</b>                | <b>0.92</b>       | -0.10               | 0                 |
| exposure to predators PC             |                   | -0.17                      | 0                 | <b>-0.22</b>        | <b>0.88</b>       |
| N avian predators PC                 |                   | 0.07                       | 0                 | -0.05               | 0                 |
| MGS duration PC                      |                   | -0.01                      | 0                 | -0.08               | 0                 |
| foraging cost PC                     |                   | -0.14                      | 0                 | -0.06               | 0                 |
| food fibre PC                        |                   | -0.13                      | 0                 | 0.03                | 0                 |
| diet specialisation                  | generalist        | 0.00                       | 0                 | 0.00                | 0                 |
|                                      | specialist        | 0.04                       |                   | -0.07               |                   |
| habitat specialisation               | generalist        | 0.00                       | 0                 | 0.00                | 0                 |
|                                      | specialist        | 0.10                       |                   | -0.11               |                   |
| period of activity                   | diurnal           | 0.00                       | 0                 | 0.00                | 0                 |
|                                      | nocturnal         | 0.31                       |                   | -0.38               |                   |
| sedentariness                        | resident          | 0.00                       | 0                 | 0.00                | 0                 |
|                                      | migratory         | 0.14                       |                   | 0.07                |                   |
| region                               | both              | 0.00                       |                   | 0.00                |                   |
|                                      | island            | -0.32                      | 0                 | -0.12               | 0                 |
|                                      | southern          | 0.39                       |                   | -0.16               |                   |
| chick development mode               | non-precocial     | 0.00                       | 0                 | 0.00                | 0                 |
|                                      | precocial         | -0.10                      |                   | -0.36               |                   |
| parental care mode                   | biparental        | 0.00                       |                   | 0.00                |                   |
|                                      | cooperation       | -0.08                      | 0                 | -0.17               | 0                 |
| social system                        | uniparental       | 0.53                       |                   | 0.34                |                   |
|                                      | family-living     | 0.00                       |                   | 0.00                |                   |
|                                      | non family-living | -0.23                      | 0                 | -0.25               | 0                 |

206 **Bold** estimates correspond to predictors with significant effect.

207 PC: principal component from Table 2.

208 F<sub>S300</sub>: frequency of trees for which p-values < 0.05.

209 \*: reference level of categorical variables have an estimate of 0; estimates reflect difference in slope  
 210 between the reference level and focal level.

211 Phylogenetic effect longevity model: likelihood ratio test: LRT = 29.52, df = 1, p < 0.001

212 Phylogenetic effect juvenile survival model: likelihood ratio test: LRT = 3.33, df = 1, p = 0.0

## 213 Results

214 **Correlates of juvenile survival and longevity.** Juvenile survival rate ranged from 0.08 to 0.95 (0.39  
215  $\pm$  0.16; mean  $\pm$  SD) and maximum longevity ranged from 5 to 51 (17.7  $\pm$  9.0) years. Juvenile survival  
216 and longevity both correlated with the life-history pace PC, where species with a slow life-history  
217 pace (large body size, low annual reproductive investment, long incubation period; Table 1) had  
218 significantly higher juvenile survival and greater longevity compared to species with a fast life-history  
219 pace (small body size, high annual reproductive investment, short incubation period; Tables 1 and 3).  
220 Moreover, juvenile survival was higher in species with a high nest predation risk (open nest close to  
221 the ground or on the ground; Tables 1 and 3), while longevity was greater in species with a low  
222 exposure of adults to predators (pelagic forager, living in open habitat; Tables 1 and 3). The  
223 phylogenetic effect was only significant for longevity (Table 3).

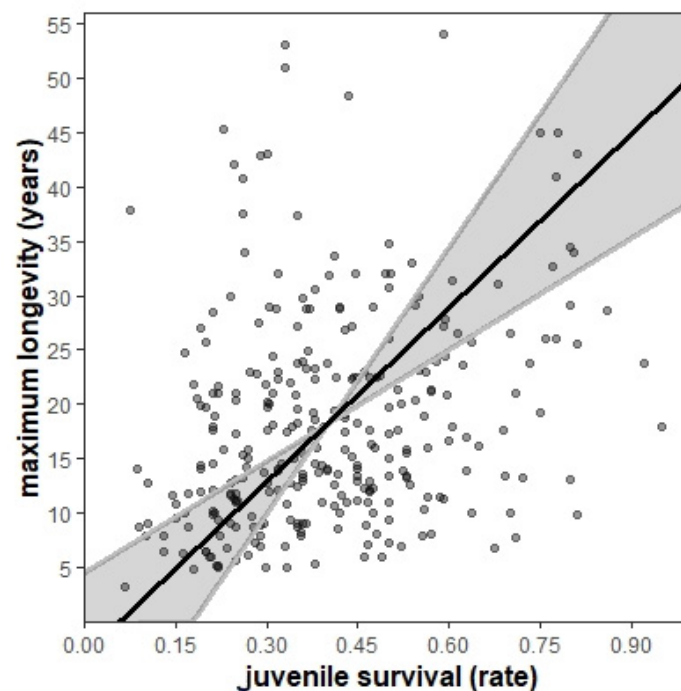

224

225 **Figure 1 | Correlation between juvenile survival (first-year survival) and maximum longevity on 293**  
226 **bird species.**

227 RMA slope = 53.15, 95% CI (34.13, 81.71);  $r_{\text{Spearman}} = 0.28$ ,  $S = 3003600$ ,  $p < 0.0001$ . 64 species (22%)  
228 are inside and 229 (78%) outside the 95%CI of the regression line (shaded area). See Fig. S6 for species  
229 identification.

230 **Combinations of juvenile survival and longevity.** Juvenile survival and longevity were positively  
231 correlated ( $r_{\text{Spearman}} = 0.28$ ,  $p < 0.0001$ ) (Figs. 1 and S5) and the slope of their linear regression was  
232 significant ( $N = 293$ , RMA slope = 53.15, 95% CI of the slope: 34.13, 81.71,  $p < 0.0001$ ). However,  
233 there were major deviations from the regression line ( $R^2 = 0.07$ ), and 229 of 293 species (78%) fell  
234 outside the 95% confidence interval (CI) of the RMA regression (Figs. 1 and S6). We note that the  
235 percentage of species that deviate from the overall juvenile survival-longevity relationship was only  
236 a slightly lower (71%) when using a more conservative CI (99%CI: Fig. S7).

237 *Positive associations between juvenile survival and longevity.* In general, positive JS-L  
238 combinations were associated with family living, or a high risk of nest predation (open nest on or  
239 close to the ground, Table 1) but those effects were independent of the direction of the relationship  
240 (significant simple effects: Table S8). Opposite positive combinations of juvenile survival and  
241 longevity (low-low vs. high-high) were differently associated with specific-species attributes. This  
242 was reflected by the significant two-way interactions between the sign of PC1 (negative: low-low vs.  
243 positive: high-high JS-L combinations, Fig. 2) and sedentariness, exposure to predators, life-history  
244 pace and parental care mode. Species with high juvenile survival-high longevity combinations were  
245 migratory, had a low exposure to adult predators (pelagic forager, living in open habitat; Table 1), a  
246 slow life-history pace or uniparental care. In contrast, species with low juvenile survival-low  
247 longevity combinations were sedentary, had high exposure to predators, a fast life-history pace, or  
248 had bi-parental or cooperative offspring care) (Figs. 2 and S8, Table S8).

249 *Mismatches between juvenile survival and longevity.* In general, JS-L mismatches were associated  
250 with low exposure to adult predators (pelagic foraging, living in open habitat, Table 1) or being a  
251 habitat generalist, but these effects were independent of the direction of the relationship between  
252 juvenile survival and longevity (significant simple effects: Table S9). Opposite JS-L mismatches (low-  
253 high vs. high-low) were differently associated with specific-species attributes as reflected by the  
254 significant two-way interactions between the sign of PC2 (negative: low-high vs. positive: high-low

255 JS-L combinations, Fig. 2) and period of activity, MGS duration and life-history pace. Species with  
 256 stronger than expected combinations of high juvenile survival-low longevity lived in stable  
 257 environments with long growing seasons (Table 1), or were nocturnal. In contrast, species with  
 258 outstandingly low juvenile survival-high longevity combinations lived in variable environment with  
 259 short growing seasons (Table 1) or had a slow life-history pace (Figs. 2 and S9, Table S9).

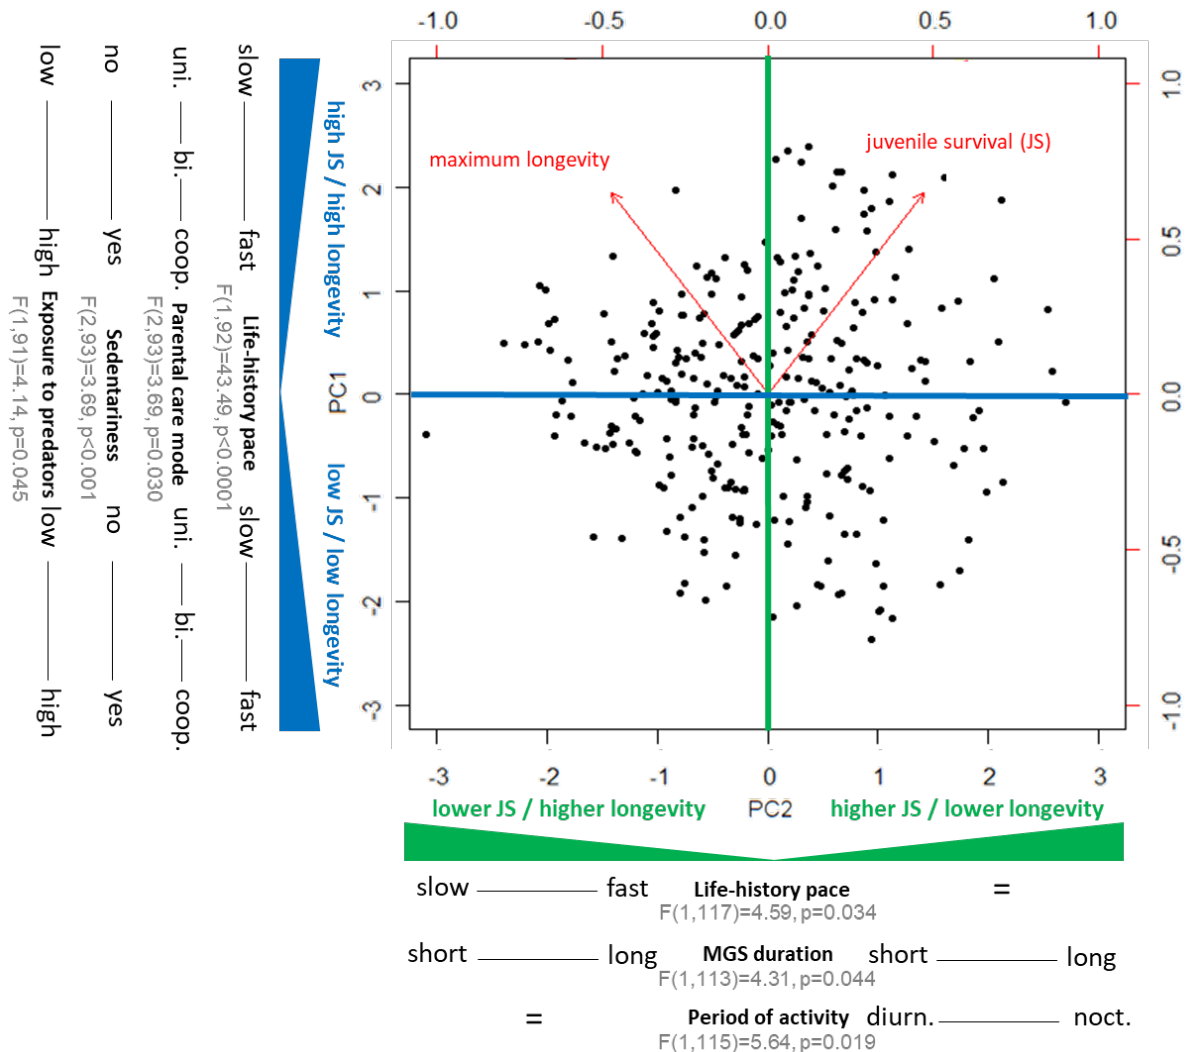

260 **Figure 2 | Correlates of the positive (PC1) and mismatching (PC2) combinations of juvenile survival**  
 261 **and longevity.** Graphical summary of the main results from the backward model selections on  
 262 phylogenetically controlled linear mixed models investigating which life-history, ecological and social  
 263 traits characterised species with different combinations of juvenile survival (first-year survival) and  
 264 longevity (N=204).

265 The blue axis (PC1) represents combinations that concur with tETA's classical prediction (high juvenile  
 266 survival associated with high longevity or vice versa). The green axis (PC2) represents combinations  
 267 that deviate from tETA's classical prediction (deviation towards higher juvenile survival associated  
 268 with lower longevity or vice versa). Graphics of each independent results are provided in Figs. S8 and  
 269 S9. See Fig. S10 for species identification and Fig. S11 for order identification.

270 JS = juvenile survival, Coop. = cooperative breeding, bi. = biparental care, uni. = uniparental care, noct.  
 271 = nocturnal, diurn. = diurnal,  $F(\dots, \dots)$  = Conditional F statistic and its degrees of freedoms averaged  
 272 over the 300 models,  $p$  = averaged  $p$  value over the 300 models.

## 273 Discussion

274 Empirical studies often use longevity as a proxy of life-history pace, based on the assumption of tETA  
275 that juvenile survival and longevity are positively correlated<sup>2,8,12,94</sup>. While this pattern is supported by  
276 previous work<sup>2,6,7,12</sup> and is generally visible in our data, our analyses show that around 70% of bird  
277 species significantly deviate from this overall juvenile survival-longevity positive relationship (Figs. 1  
278 and S6). Our analyses demonstrate that a wide range of survival-longevity combinations evolved, some in  
279 accordance with the classical prediction of tETA while others contrasting it, partly supporting recent  
280 developments in this field<sup>9,14-16</sup>. Overall, this study raises awareness on the fact that the relationship  
281 between juvenile survival and longevity is not a black or white concept, but a range of grey nuances,  
282 and identifies key evolutionary forces driving the coevolution between juvenile survival and  
283 longevity.

284 **Correlates of juvenile survival and longevity.** On average, a slow life-history pace (in our study  
285 corresponding to: large body size, low annual reproductive investment, long incubation period,  
286 Table 2) is associated with high juvenile survival and longevity (Table 3), supporting life-history  
287 theory<sup>12,19</sup>. However, while juvenile survival and longevity are positively correlated (Figs. 1 and S5),  
288 their individual variation are also associated with particular parameters (Table 3; <sup>95</sup>), supporting  
289 findings from mammals<sup>21</sup>. Our analyses show that nest predation risk (index based on nest location  
290 and nest type, Table 1) only influences juvenile survival while exposure to predators of adults (index  
291 of habitat openness, Table 1 and 2) only influences longevity (Table 3). Consequently, these factors  
292 are likely to play an important role in the evolution of diverse juvenile survival-longevity patterns.

293 Juveniles are often less conspicuous than adults due to more cryptic coloration and  
294 behaviours<sup>96-99</sup>, reducing their vulnerability to predation. Accordingly, a high exposure to predators  
295 of adults is associated with decreased longevity only (Table 3). In contrast, a low nest predation risk  
296 is associated with low juvenile survival only (Table 3). In this study, this latter association concerns  
297 mainly cavity-breeding species (Table 2) known to often experience a lower nest predation risk than



298 open-nesting species<sup>72</sup>. However, in cavities, nestlings are often exposed to ectoparasites<sup>100,101</sup>,  
299 reducing their body condition<sup>100,102,103</sup>, potentially explaining a reduced juvenile survival in these  
300 species<sup>95</sup> (Table 3). Therefore, nesting habits that provide short-term benefits early on in life may  
301 have negative down-streams effect on juvenile survival that so far were not anticipated (but see<sup>42</sup>).

302 **Combinations of juvenile survival and longevity.** Most species (78%) deviate significantly from the  
303 positive juvenile survival-longevity regression revealing the existence of a continuum of patterns  
304 (Figs. 1 and S6), challenging the classical assumption of tETA<sup>2,6,7,12</sup>. The degree of this deviation varies  
305 considerably between species (Figs. 2 and S10), demonstrating that the association between juvenile  
306 survival and longevity evolved towards multiple adaptive combinations in birds. Some part of this  
307 mismatch may represent random variation and cannot be explained by consistent biological  
308 patterns. However, variation in survival at different life stages is likely to represent distinct  
309 strategies, shaped by natural selection to achieve the most optimal solutions in a given combination  
310 of external and internal factors. Thus, instead of forcing the long-accepted pattern of tETA or  
311 challenging it with opposing hypotheses, we should adopt a more diverse approach. Accordingly,  
312 one should embrace that various possible juvenile survival-longevity combinations exist (including  
313 the non-tETA compliant ones), and their actual values should be assumed to maximize population  
314 viability. Our framework integrating ecological, life-history and social moderators clearly  
315 demonstrates that such a heterogeneous picture is biologically more realistic.

316 Our analyses on the associations between juvenile survival and longevity do not allow us to  
317 investigate unusual juvenile survival and longevity separately, limiting our ability to identify  
318 underlying mechanisms. This would require an in-depth view of what is happening between  
319 individuals, calling for more comparative studies and experiments on both juvenile survival and  
320 longevity at the intra-species level. However, species-level deviations from the positive correlation  
321 between juvenile survival and longevity likely reflect that certain selective factors only influence  
322 specific life stages<sup>35,104</sup>. Patterns observed between different taxa can be thought of as averaged

323 outcomes of selective pressures, acting over long periods of time. Indeed, age-dependent changes in  
324 body size, coloration, behaviour, or the onset of reproduction and senescence, can affect extrinsic  
325 and intrinsic mortality differently at different life stages<sup>35,104</sup>. For example, juveniles early on in life  
326 are often smaller than adults, making them more susceptible to predation<sup>32,39</sup>. Also, juvenile survival  
327 may be low in species that live in challenging environments, have elaborate foraging techniques or a  
328 specialised diet, as juveniles in those species seem to need more time to acquire adult skill  
329 levels<sup>62,68,105</sup>. In contrast, only adults pay costs of reproduction, which may reduce their longevity  
330 directly, or indirectly, for instance through increased exposure to predators as a consequence of  
331 increased foraging effort<sup>106</sup>, or displaying the own quality to potential partners<sup>107</sup>.

332 *Positive associations between juvenile survival and longevity.* Positive JS-L combinations are in  
333 accordance with the classical prediction of tETA, indicating that life-history, ecological, and social  
334 parameters have similar effects on juvenile survival and longevity. Our analyses show that high  
335 juvenile survival-high longevity combinations are found in species that are migratory, have a low  
336 exposure to predators, a slow life-history pace or uniparental care (Fig. 2), and are mostly observed  
337 in Accipitriformes, Anseriformes, Charadriiformes, and Pelicaniformes (Fig. S11). In contrast, low  
338 juvenile survival-low longevity combinations are found in species that are sedentary, have a high  
339 exposure to predators, a fast life-history pace, or have cooperative or biparental brood care (Fig. 2),  
340 and are mostly observed in Galliformes and Passeriformes (Fig. S11).

341 Migration is regularly found in species breeding at higher latitudes or altitudes, allowing  
342 them to escape harsh winter conditions<sup>55</sup>. In most of these species, juveniles and adults are  
343 migratory, thus affecting both life stages. While previous research showed that migration can be  
344 costly (i.e., being associated with smaller relative brain sizes;<sup>108</sup>), our results highlight that it has a  
345 positive effect on survival in general. Moreover, a low exposure to predators is beneficial for both  
346 juvenile and adults, making pelagic species particularly long-lived<sup>32</sup>. As predicted by life-history  
347 theory, species with a slow life-history pace have increased juvenile survival and longevity<sup>12,19,66</sup>.

348 Furthermore, parental care is costly<sup>54,109</sup>. To ensure the survival of their offspring, parents provide  
349 them with food, thermoregulation, and protection from predators, which, on top of being energy  
350 demanding, exposes the parents to an increased risk of predation<sup>54,110</sup>. Thus, it seems surprising that  
351 species with uniparental care have combination of higher juvenile survival and longevity compared  
352 to biparental and cooperatively breeding species. A possible explanation is that particularly species  
353 with low costs of parental care evolved uniparental care, leading to increased juvenile survival and  
354 longevity. Clearly, this finding calls for further studies to investigate both the drivers and  
355 consequences of uniparental care.

356 *Mismatches between juvenile survival and longevity.* Mismatching combinations of juvenile  
357 survival and longevity suggest that certain factors specifically act upon juvenile survival or longevity,  
358 or have opposing effects on juvenile survival and longevity, leading to age-specific differences in  
359 survival. Our results demonstrate that high juvenile survival-low longevity combinations are found in  
360 species that live in stable environments with long growing seasons or are nocturnal (Fig. 2), and are  
361 mostly observed in Apodiformes and Galliformes (Fig. S11). In contrast, low juvenile survival-high  
362 longevity combinations are found in species that live in variable environments with short growing  
363 seasons or have a slow life-history pace (Fig. 2), and are mostly observed in Pelicaniformes and  
364 Procellariiformes (Fig. S11).

365 Conceivably, living in stable environments may particularly affect juvenile survival, reducing  
366 their winter mortality, while the opposite is the case in variable environments. The high juvenile  
367 survival-low longevity combinations found in nocturnal or crepuscular species is likely to reflect  
368 reduced juvenile mortality, given that most predators of birds are diurnal bird species<sup>32</sup>. In contrast,  
369 combinations of low juvenile survival-high longevity found in species with a slow life-history pace is  
370 likely to reflect that long-lived species particularly invest in longevity, at the expense of high juvenile  
371 survival in some species. Generally, interpreting those interactions is not straightforward. We urge

372 further studies, especially longitudinal ones, to improve our understanding of the interesting  
373 interspecific patterns revealed here.

374 **Conclusions.** Our comparative study provides novel insights into interspecific variation in juvenile  
375 survival, longevity and their combination in birds, and highlights the importance to consider age-  
376 specific survival to understand the evolution of life-history traits<sup>22,25,26,42,111</sup>. It increases our  
377 knowledge on the correlates of longevity and the under-studied juvenile survival and shows that  
378 most species deviate from the classical prediction of tETA. Our findings show that multiple adaptive  
379 combinations of juvenile survival and longevity evolved (more than commonly expected), some in  
380 accordance with tETA's classical prediction while others contradict it. Accordingly, we call for a  
381 novel, more diverse, approach to understand the link between juvenile survival and longevity, and to  
382 move beyond the classical prediction of tETA. Our analyses demonstrate that positive JS-L  
383 combinations co-vary along the pace of life continuum, and JS-L mismatches co-vary with the length  
384 of the growing season, where long growing seasons promote juvenile survival, while short growing  
385 seasons promote longevity. Interestingly, sociality (parental care) only explains positive JS-L  
386 combinations, while ecological and life-history traits explain both positive JS-L combinations  
387 (sedentariness, exposure to predators, pace of life) and JS-L mismatches (length of growing season,  
388 period of activity, pace of life). Finally, our analysis emphasizes the need of not only studying typical  
389 patterns, predicted by accepted hypotheses – but also looking at outlying cases, that may embody  
390 genuine biological patterns rather than random deviations from assumed relationships.

391 Overall, this study reveals that the various combinations of juvenile survival and longevity  
392 observed are shaped by a distinct and limited set of species-specific life-history, ecological and social  
393 attributes. This may reflect divergent selection on each survival estimate, or that divergent age-  
394 specific survival is at the origin of diversity in species attributes<sup>112</sup>. Finally, species with unexpected  
395 age-specific survival relationships are more likely to evolve uncommon combination of life-history

396 traits<sup>28</sup>. Thus, insights into key factors associating with unusual age-specific survival (such as the one  
397 found in this study) could contribute to a better understanding of life-history evolution<sup>22,25-28,42,111</sup>.

## 398 Acknowledgements

399 We thank Carel van Schaik and Gretchen Wagner for discussions and comments on the manuscript.  
400 Kate Mears and Katharine Bowgen for the help with data compilation. This study was financed by  
401 the Swiss National Research Foundation (grant number PPOOP3\_123520 and PPOOP3\_150752, to  
402 MG), the Polish National Science Centre (Sonata Bis program, grant agreement no UMO-  
403 2015/18/E/NZ8/00505, to SMD) and the Australian Research Council (DECRA Fellowship number  
404 DE180100202).

405

## 406 Authorship:

407 M.G. and E.M. compiled part of the data, E.M. performed all statistical analyses and wrote the first  
408 draft of the manuscript. M.G. and S.M.D contributed suggestions and text to subsequent drafts. S.M.D  
409 helped with the statistical methods. All authors contributed to revisions and gave final approval for  
410 publication.

411

## 412 Competing Interests statement:

413 The research was conducted in the absence of any commercial or financial relationships that could be  
414 construed as a potential conflict of interest.

415

## 416 Data accessibility:

417 The datasets supporting this article have been uploaded as part of the Supporting Information and  
418 will be archived in Dryad. The data DOI will be included at the end of the article.

419

## 420 Figure Legend:

421 **Figure 1:** Correlation between juvenile survival (first-year survival) and maximum longevity on 293  
422 species.

423 **Figure 2:** Graphical summary of the key results from the backward model selections on phylogenetically  
424 controlled linear mixed models investigating which life-history, ecological and social traits characterised  
425 species with different combinations of juvenile survival (first-year survival) and longevity.

426

## 427 Table Legend:

428 **Table 1.** Description and prediction of the parameters investigated in this study.

429 **Table 2.** Results of the Principal Component Analysis (PCA) with varimax rotation on the 12 continuous  
430 predictors.

431 **Table 3.** Results from phylogenetically controlled linear mixed-effect models testing the influence of key  
432 life-history, ecological and social traits on juvenile survival and longevity, respectively.

## REFERENCES

- 1 Medawar, P. B. *An Unsolved Problem of Biology*. (Lewis, 1952).
- 2 Williams, G. C. Pleiotropy, natural selection, and the evolution of senescence. *Evolution* **11**, 398-411, doi:10.2307/2406060 (1957).
- 3 Kirkwood, T. B. L. Evolution of ageing. *Nature* **270**, 301-304 (1977).
- 4 Kirkwood, T. B. L. & Austad, S. N. Why do we age? *Nature* **408**, 233-238, doi:10.1038/35041682 (2000).
- 5 Abrams, P. A. Does Increased mortality favor the evolution of more rapid senescence? *Evolution* **47**, 877-887, doi:10.2307/2410191 (1993).
- 6 Kirkwood, T. B. L. Evolution of ageing. *Mech Ageing Dev* **123**, 737-745, doi:10.1016/s0047-6374(01)00419-5 (2002).
- 7 Ricklefs, R. E. Evolutionary theories of aging: Confirmation of a fundamental prediction, with implications for the genetic basis and evolution of life span. *Am. Nat.* **152**, 24-44, doi:10.1086/286147 (1998).
- 8 Ricklefs, R. E. & Scheuerlein, A. in *Lifespan: Evolutionary, Ecological and Demographic Perspectives* Vol. A supplement to Population and Development Review, volume 29 (eds J. R. Carey & S. Tuljapurkar) 71-98 (Population Council, 2003).
- 9 Shokhirev, M. N. & Johnson, A. A. Effects of Extrinsic Mortality on the Evolution of Aging: A Stochastic Modeling Approach. *PLoS ONE* **9**, doi:10.1371/journal.pone.0086602 (2014).
- 10 Williams, P. D., Day, T., Fletcher, Q. & Rowe, L. The shaping of senescence in the wild. *Trends Ecol. Evol.* **21**, 458-463, doi:10.1016/j.tree.2006.05.008 (2006).
- 11 Caswell, H. Extrinsic mortality and the evolution of senescence. *Trends Ecol. Evol.* **22**, 173-174, doi:10.1016/j.tree.2007.01.006 (2007).
- 12 Charlesworth, B. *Evolution in Age Structured Populations*. (Cambridge University Press, 1994).
- 13 Williams, P. D. & Day, T. Antagonistic pleiotropy, mortality source interactions, and the evolutionary theory of senescence. *Evolution* **57**, 1478-1488, 1411 (2003).
- 14 Chen, H. & Maklakov, Alexei A. Longer Life Span Evolves under High Rates of Condition-Dependent Mortality. *Curr. Biol.* **22**, 2140-2143, doi:<http://dx.doi.org/10.1016/j.cub.2012.09.021> (2012).
- 15 Dowling, D. K. Aging: Evolution of Life Span Revisited. *Curr. Biol.* **22**, R947-R949, doi:<https://doi.org/10.1016/j.cub.2012.09.029> (2012).
- 16 Werfel, J., Ingber, D. E. & Bar-Yam, Y. Theory and associated phenomenology for intrinsic mortality arising from natural selection. *PLoS ONE* **12**, e0173677, doi:10.1371/journal.pone.0173677 (2017).
- 17 Reznick, D. N., Bryant, M. J., Roff, D., Ghalambor, C. K. & Ghalambor, D. E. Effect of extrinsic mortality on the evolution of senescence in guppies. *Nature* **431**, 1095-1099, doi:[http://www.nature.com/nature/journal/v431/n7012/supinfo/nature02936\\_S1.html](http://www.nature.com/nature/journal/v431/n7012/supinfo/nature02936_S1.html) (2004).
- 18 Roff, D. A. *The Evolution of Life Histories*. (Chapman and Hall, 1992).
- 19 Stearns, S. C. *The Evolution of Life Histories*. (Oxford University Press, 1992).
- 20 Martin, T. E. Age-related mortality explains life history strategies of tropical and temperate songbirds. *Science* **349**, 966-970, doi:10.1126/science.aad1173 (2015).
- 21 Promislow, D. E. L. & Harvey, P. H. Living fast and dying young - A comparative analysis of the life-history variation among mammals. *J. Zool.* **220**, 417-437 (1990).
- 22 Reznick, D. A., Bryga, H. & Endler, J. A. Experimentally induced life-history evolution in a natural population. *Nature* **346**, 357-359, doi:10.1038/346357a0 (1990).
- 23 Cole, L. C. The population consequences of life history phenomena. *Q. Rev. Biol.* **29**, 103-137, doi:10.1086/400074 (1954).

- 24 Williams, G. C. Natural selection, costs of reproduction, and a refinement of Lack's principle. *Am. Nat.* **100**, 687-690, doi:10.1086/282461 (1966).
- 25 Promislow, D. E. L. & Harvey, P. H. Mortality rates and the evolution of mammal life histories. *Acta Oecologica-International Journal of Ecology* **12**, 119-137 (1991).
- 26 Michod, R. E. Evolution of life histories in response to age-specific mortality factors. *Am. Nat.* **113**, 531-550, doi:10.1086/283411 (1979).
- 27 Martin, T. E. A new view of avian life-history evolution tested on an incubation paradox. *Proc. R. Soc. B* **269**, 309-316, doi:10.1098/rspb.2001.1879 (2002).
- 28 Kraus, C., Thomson, D. L., Kunkele, J. & Trillmich, F. Living slow and dying young? Life-history strategy and age-specific survival rates in a precocial small mammal. *J. Anim. Ecol.* **74**, 171-180, doi:10.1111/j.1365-2656.2004.00910.x (2005).
- 29 Briggs-Gonzalez, V. *et al.* Life histories and conservation of long-lived reptiles, an illustration with the American crocodile (*Crocodylus acutus*). *J. Anim. Ecol.* **86**, 1102-1113, doi:doi:10.1111/1365-2656.12723 (2017).
- 30 Jones, O. R. *et al.* Diversity of ageing across the tree of life. *Nature* **505**, 169, doi:10.1038/nature12789  
<https://www.nature.com/articles/nature12789#supplementary-information> (2013).
- 31 Healy, K. *et al.* Ecology and mode-of-life explain lifespan variation in birds and mammals. *Proc. R. Soc. B* **281**, doi:10.1098/rspb.2014.0298 (2014).
- 32 Valcu, M., Dale, J., Griesser, M., Nakagawa, S. & Kempenaers, B. Global gradients of avian longevity support the classic evolutionary theory of ageing. *Ecography* **37**, 930-938, doi:10.1111/ecog.00929 (2014).
- 33 de Magalhaes, J. P., Costa, J. & Church, G. M. An analysis of the relationship between metabolism, developmental schedules, and longevity using phylogenetic independent contrasts. *Journals of Gerontology Series a-Biological Sciences and Medical Sciences* **62**, 149-160 (2007).
- 34 Wasser, D. E. & Sherman, P. W. Avian longevities and their interpretation under evolutionary theories of senescence. *J. Zool.* **280**, 103-155, doi:10.1111/j.1469-7998.2009.00671.x (2010).
- 35 Sullivan, K. A. Predation and Starvation: Age-Specific Mortality in Juvenile Juncos (*Junco phaeotus*). *Journal of Animal Ecology* **58**, 275-286 (1989).
- 36 Caughley, G. Mortality Patterns in Mammals. *Ecology* **47**, 906-918 (1966).
- 37 Charnov, E. L. Life History Evolution in a "Recruitment Population": Why Are Adult Mortality Rates Constant? *Oikos* **47**, 129-134, doi:10.2307/3566037 (1986).
- 38 Gaillard, J. M., Festa-Bianchet, M., Yoccoz, N. G., Loison, A. & Toigo, C. Temporal variation in fitness components and population dynamics of large herbivores. *Annu. Rev. Ecol. Syst.* **31**, 367-393, doi:10.1146/annurev.ecolsys.31.1.367 (2000).
- 39 Caro, T. *Antipredator Defenses in Birds and Mammals*. (University of Chicago Press, 2005).
- 40 Werner, E. E. & Hall, D. J. Ontogenetic habitat shifts in bluegill: the foraging rate-predation risk trade-off. *Ecology* **69**, 1352-1366 (1988).
- 41 Griesser, M. *et al.* Experience buffers extrinsic mortality in a group-living bird species. *Oikos* **126**, 1258-1268, doi:10.1111/oik.04098 (2017).
- 42 Martin, T. E. A Conceptual Framework for Clutch-Size Evolution in Songbirds. *Am. Nat.* **183**, 313-324, doi:10.1086/674966 (2014).
- 43 Ricklefs, R. E. Lack, Skutch, and Moreau: The early development of life-history thinking. *Condor* **102**, 3-8 (2000).
- 44 Skutch, A. F. Clutch size, nesting success, and predation on nests of Neotropical birds, reviewed. *Ornithol Monogr*, 575-594 (1985).
- 45 Gruebler, M. U. & Naef-Daenzer, B. Survival benefits of post-fledging care: experimental approach to a critical part of avian reproductive strategies. *J. Anim. Ecol.* **79**, 334-341, doi:10.1111/j.1365-2656.2009.01650.x (2010).

- 46 Drobniak, M. S., Wagner, G., Mouroq, E. & Griesser, M. Family living: an overlooked but pivotal social system to understand the evolution of cooperative breeding. *Behav. Ecol.* **26**, 805-811, doi:10.1093/beheco/arv015 (2015).
- 47 Griesser, M., Nystrand, M. & Ekman, J. Reduced mortality selects for family cohesion in a social species. *Proc. R. Soc. B* **273**, 1881-1886 (2006).
- 48 Robinson, W. D. *et al.* Diversification of Life Histories in New World Birds. *Auk* **127**, 253-262 (2010).
- 49 Møller, A. P. Sociality, age at first reproduction and senescence: comparative analysis of birds. *Journal for Evolutionary Biology* **19**, 682-689 (2006).
- 50 Carey, J. R. & Tuljapurkar, S. *Life Span: Evolutionary, Ecological, and Demographic Perspectives*. Vol. Population and development review. A Supplement to Volume 29, 2003 (Population council, 2003).
- 51 Maness, T. J. & Anderson, D. J. in *Predictors of Juvenile Survival in Birds Ornithological Monographs* 1-55 (2013).
- 52 Cox, W. A., Thompson, F. R., Cox, A. S. & Faaborg, J. Post-fledging survival in passerine birds and the value of post-fledging studies to conservation. *The Journal of Wildlife Management* **78**, 183-193, doi:10.1002/jwmg.670 (2014).
- 53 Russell, E. M. Avian life histories: Is extended parental care the southern secret? *Emu* **100**, 377-399, doi:10.1071/mu0005s (2000).
- 54 Alonso-Alvarez, C. & Velando, A. in *The Evolution of parental care* (eds N. J. Royle, P. T. Smiseth, & M. Kölliker) 40-61 (Oxford University Press, 2012).
- 55 Cox, G. W. The Evolution of Avian Migration Systems between Temperate and Tropical Regions of the New World. *The American Naturalist* **126**, 451-474, doi:10.1086/284432 (1985).
- 56 Sibly, R. M. *et al.* Energetics, lifestyle, and reproduction in birds. *Proc. Natl. Acad. Sci. U.S.A* **109**, 10937-10941, doi:10.1073/pnas.1206512109 (2012).
- 57 Whittingham, M. J. & Evans, K. L. The effects of habitat structure on predation risk of birds in agricultural landscapes. *Ibis* **146**, 210-220, doi:doi:10.1111/j.1474-919X.2004.00370.x (2004).
- 58 Lazarus, J. & Symonds, M. Contrasting effects of protective and obstructive cover on avian vigilance. *Anim. Behav.* **43**, 519-521, doi:[https://doi.org/10.1016/S0003-3472\(05\)80110-1](https://doi.org/10.1016/S0003-3472(05)80110-1) (1992).
- 59 Lima, S. L. Protective Cover and the Use of Space: Different Strategies in Finches. *Oikos* **58**, 151-158, doi:10.2307/3545422 (1990).
- 60 Isler, K. & van Schaik, C. Costs of encephalization: the energy trade-off hypothesis tested on birds. *Journal of Human Evolution* **51**, 228-243 (2006).
- 61 Langer, P. Lactation, weaning period, food quality, and digestive tract differentiations in eutheria. *Evolution* **57**, 1196-1215 (2003).
- 62 Bautista, L. M., Tinbergen, J. & Kacelnik, A. To walk or to fly? How birds choose among foraging modes. *Proc. Natl. Acad. Sci. U.S.A* **98**, 1089-1094, doi:10.1073/pnas.98.3.1089 (2001).
- 63 Colles, A., Liow, L. H. & Prinzing, A. Are specialists at risk under environmental change? Neocological, paleoecological and phylogenetic approaches. *Ecol. Lett.* **12**, 849-863, doi:doi:10.1111/j.1461-0248.2009.01336.x (2009).
- 64 Julliard, R., Jiguet, F. & Couvet, D. Common birds facing global changes: what makes a species at risk? *Global Change Biol.* **10**, 148-154, doi:doi:10.1111/j.1365-2486.2003.00723.x (2004).
- 65 Wilson, S. K. *et al.* Habitat utilization by coral reef fish: implications for specialists vs. generalists in a changing environment. *J. Anim. Ecol.* **77**, 220-228, doi:doi:10.1111/j.1365-2656.2007.01341.x (2008).
- 66 McNamara, J. M., Barta, Z., Wikelski, M. & Houston, A. I. A Theoretical Investigation of the Effect of Latitude on Avian Life Histories. *The American Naturalist* **172**, 331-345 (2008).
- 67 Blondel, J. *Evolution and ecology of birds on islands: Trends and prospects*. Vol. 50 (2000).



- 68 Heinsohn, R. G. Slow Learning of Foraging Skills and Extended Parental Care in Cooperatively Breeding White-Winged Coughs. *The American Naturalist* **137**, 864-881, doi:10.2307/2462405 (1991).
- 69 Blumstein, D. T. & Møller, A. P. Is sociality associated with high longevity in North American birds? *Biol. Lett.* **4**, 146-148, doi:10.1098/rsbl.2007.0606 (2008).
- 70 Van de Loock, D. *et al.* Cooperative breeding shapes post-fledging survival in an Afrotropical forest bird. *Ecology and Evolution*, n/a-n/a, doi:10.1002/ece3.2744 (2017).
- 71 Tarwater, C. E. & Brawn, J. D. The post-fledging period in a tropical bird: patterns of parental care and survival. *J. Avian Biol.* **41**, 479-487 (2010).
- 72 Martin, T. E. & Li, P. J. Life-history traits of open-nesting vs cavity-nesting birds. *Ecology* **73**, 579-592, doi:10.2307/1940764 (1992).
- 73 Martin, T. E. Nest predation and nest sites - New perspectives on old patterns. *Bioscience* **43**, 523-532, doi:10.2307/1311947 (1993).
- 74 Schmidtn.K. Locomotion: energy cost of swimming, flying, and running. *Science* **177**, 222-&, doi:10.1126/science.177.4045.222 (1972).
- 75 IUCN. IUCN Habitat Classification Scheme. (2007).
- 76 Botero, C. A. & Rubenstein, D. R. Fluctuating Environments, Sexual Selection and the Evolution of Flexible Mate Choice in Birds. *PLoS ONE* **7**, doi:10.1371/journal.pone.0032311 (2012).
- 77 Del Hoyo, J., Elliot, A., Sargatal, J. & Christie, D. A. *Handbook of the Birds of the World*. Available via <http://www.hbw.com>. (Lynx, 2011).
- 78 Poole, A. The birds of North America online. *Cornell Laboratory of Ornithology, Ithaca, NY*. Available via <http://bna.birds.cornell.edu/BNA> (2005).
- 79 Higgins, P. J. *et al.* *Handbook of Australian, New Zealand & Antarctic Birds*. (Oxford University Press, 1996-2006).
- 80 Maclean, G. L. & Robert, A. *Roberts' birds of southern Africa*. (Trustees of the John Voelcker Bird Book Fund Cape Town, 1985).
- 81 Commonwealth of Australia. *Australian Bird and Bat Banding Scheme Database, queried (May 2014)*. Available via <http://www.environment.gov.au/science/bird-and-bat-banding>. (Department of the Environment, 2014).
- 82 de Magalhaes, J. P. & Costa, J. A database of vertebrate longevity records and their relation to other life-history traits. *J. Evol. Biol.* **22**, 1770-1774, doi:10.1111/j.1420-9101.2009.01783.x (2009).
- 83 Sankamethawee, W., Gale, G. A. & Hardesty, B. D. Post-Fledgling Survival of the Cooperatively Breeding Puff-Throated Bulbul (*Alophoixus Pallidus*). *The Condor* **111**, 675-683, 679 (2009).
- 84 Griesser, M., Drobniak, S. M., Nakagawa, S. & Botero, C. A. Family living sets the stage for cooperative breeding and ecological resilience in birds. *PLoS Biol* **15**, e2000483 (2017).
- 85 R: A language and environment for statistical computing. (R Foundation for Statistical Computing, Vienna, Austria. , 2015).
- 86 asreml: asreml() fits the linear mixed model. R package version 3.0. [www.vsni.co.uk](http://www.vsni.co.uk) (2009).
- 87 Hadfield, J. D. & Nakagawa, S. General quantitative genetic methods for comparative biology: phylogenies, taxonomies and multi-trait models for continuous and categorical characters. *J. Evol. Biol.* **23**, 494-508, doi:doi:10.1111/j.1420-9101.2009.01915.x (2010).
- 88 Huelsenbeck, J. P. & Crandall, K. A. Phylogeny estimation and hypothesis testing using maximum likelihood. *Annu. Rev. Ecol. Syst.* **28**, 437-466, doi:10.1146/annurev.ecolsys.28.1.437 (1997).
- 89 Jetz, W., Thomas, G. H., Joy, J. B., Hartmann, K. & Mooers, A. O. The global diversity of birds in space and time. *Nature* **491**, 444-448, doi:10.1038/nature11631 (2012).
- 90 Schielzeth, H. Simple means to improve the interpretability of regression coefficients. *Methods Ecol. Evol.* **1**, 103-113, doi:10.1111/j.2041-210X.2010.00012.x (2010).

- 91 Dormann, C. F. *et al.* Collinearity: a review of methods to deal with it and a simulation study evaluating their performance. *Ecography* **36**, 27-46, doi:10.1111/j.1600-0587.2012.07348.x (2013).
- 92 Barton, K. MuMIn: Multi-model inference. *R package version 2.0.0*. <http://R-Forge.R-project.org/projects/mumin/> (2013).
- 93 Burnham, K. P. & Anderson, D. R. AIC model selection and multimodel inference in behavioral ecology: some background, observations, and comparisons. *Behav. Ecol. Sociobiol.* **65**, 23-35, doi:10.1007/s00265-010-1029-6 (2011).
- 94 Keller, L. & Genoud, M. Extraordinary lifespans in ants: a test of evolutionary theories of ageing. *Nature* **389**, 958-960, doi:10.1038/40130 (1997).
- 95 Francis, C. M., Richards, M. H., Cooke, F. & Rockwell, R. F. Long-term changes in survival rates of Lesser snow geese. *Ecology* **73**, 1346-1362, doi:10.2307/1940681 (1992).
- 96 Heinen, J. T. Cryptic behavior in juvenile toads. *J. Herpetol.* **19**, 524-527, doi:10.2307/1564206 (1985).
- 97 Ryer, C. H., Lemke, J. L., Boersma, K. & Levas, S. Adaptive coloration, behavior and predation vulnerability in three juvenile north Pacific flatfishes. *J. Exp. Mar. Biol. Ecol.* **359**, 62-66, doi:10.1016/j.jembe.2008.02.017 (2008).
- 98 Caro, T. The Adaptive Significance of Coloration in Mammals. *Bioscience* **55**, 125-136, doi:10.1641/0006-3568(2005)055[0125:TASOCI]2.0.CO;2 (2005).
- 99 Baker, R. R. & Parker, G. A. The evolution of bird coloration. *Philosophical Transactions of the Royal Society of London. B, Biological Sciences* **287**, 63-130, doi:10.1098/rstb.1979.0053 (1979).
- 100 Cantarero, A., Lopez-Arrabe, J., Redondo, A. J. & Moreno, J. Behavioural responses to ectoparasites in pied flycatchers *Ficedula hypoleuca*: an experimental study. *J. Avian Biol.* **44**, 591-599, doi:10.1111/j.1600-048X.2013.00134.x (2013).
- 101 Nilsson, S. G. Evolution of hole-nesting in birds: On balancing selection pressures. *Auk* **103**, 432-435 (1986).
- 102 Tomas, G. *et al.* Determinants of abundance and effects of blood-sucking flying insects in the nest of a hole-nesting bird. *Oecologia* **156**, 305-312, doi:10.1007/s00442-008-1001-6 (2008).
- 103 Brommer, J. E., Pitala, N., Siitari, H., Klueen, E. & Gustafsson, L. Body size and immune defense of nestling blue tits (*Cyanistes caeruleus*) in response to manipulation of ectoparasites and food supply. *Auk* **128**, 556-563, doi:10.1525/auk.2011.10284 (2011).
- 104 Lack, D. *Population Studies of Birds*. (Oxford University Press, 1966).
- 105 Schuppli, C., Isler, K. & van Schaik, C. P. How to explain the unusually late age at skill competence among humans. *J. Hum. Evol.* **63**, 843-850, doi:<http://dx.doi.org/10.1016/j.jhevol.2012.08.009> (2012).
- 106 Zarybnicka, M., Korpimäki, E. & Griesser, M. Dark or Short Nights: Differential Latitudinal Constraints in Nestling Provisioning Patterns of a Nocturnally Hunting Bird Species. *PLoS ONE* **7**, doi:10.1371/journal.pone.0036932 (2012).
- 107 da Cunha, F. C. R., Fontenelle, J. C. R. & Griesser, M. The presence of conspecific females influences male-mobbing behavior. *Behavioral Ecology and Sociobiology* **71**, 52, doi:10.1007/s00265-017-2267-7 (2017).
- 108 Sol, D. *et al.* Evolutionary Divergence in Brain Size between Migratory and Resident Birds. *PLoS ONE* **5**, e9617, doi:10.1371/journal.pone.0009617 (2010).
- 109 Trivers, R. L. in *In: Sexual selection and the descent of man* (ed Aldine) 136-179 (Campbell, 1972).
- 110 Santos, E. S. A. & Nakagawa, S. The costs of parental care: a meta-analysis of the trade-off between parental effort and survival in birds. *J. Evol. Biol.* **25**, 1911-1917, doi:10.1111/j.1420-9101.2012.02569.x (2012).
- 111 Schaffer, W. M. Selection for optimal life histories: The effects of age structure. *Ecology* **55**, 291-303, doi:10.2307/1935217 (1974).

- 112 Healy, K., Ezard, T. H. G., Jones, O. R., Salguero-Gómez, R. & Buckley, Y. M. Animal life history is shaped by the pace of life and the distribution of age-specific mortality and reproduction. *Nature Ecology & Evolution*, doi:10.1038/s41559-019-0938-7 (2019).

## Tables:

Table 1| Description and prediction of the parameters investigated in this study.

|              | parameter's name            | description                                                                                                                                                                                                    | prediction                                                                                                                                                                                                                                                                                                               | source prediction |
|--------------|-----------------------------|----------------------------------------------------------------------------------------------------------------------------------------------------------------------------------------------------------------|--------------------------------------------------------------------------------------------------------------------------------------------------------------------------------------------------------------------------------------------------------------------------------------------------------------------------|-------------------|
| life-history | adult body mass*            | mean adult body mass (g)                                                                                                                                                                                       | larger body size confers better ability to cope with temporary food shortages, climatic fluctuations and extreme weather than smaller body size; large body size may associate with higher juvenile survival and higher longevity                                                                                        | 39,52             |
|              | incubation period*          | number of days from laying to hatching                                                                                                                                                                         | longer incubation period may associate with higher juvenile survival and higher longevity                                                                                                                                                                                                                                | 12,18             |
|              | nestling period*            | number of days from hatching to fledging                                                                                                                                                                       | longer nestling period may associate with higher juvenile survival and higher longevity                                                                                                                                                                                                                                  | 42                |
|              | annual parental investment* | body-mass scaled annual reproductive investment (total mass of eggs produced annually divided by adult body mass) <sup>(a)</sup>                                                                               | higher parental investment may associate with lower juvenile survival and lower longevity                                                                                                                                                                                                                                | 12,18,53          |
|              | chick development mode      | precocial vs. non precocial; semi-altricial or semi precocial species were categorised as non precocial                                                                                                        | precocial species should have lower juvenile survival but higher longevity because of lower parental care after hatching while the opposite is expected for altricial species                                                                                                                                            | 54                |
|              | sedentariness               | resident vs. migratory; based on the species maximum movement; sedentary species or with local movement were categorised as resident and the one with regional or inter-continental movement as migratory      | costs associated with migration could translate into lower juvenile survival and lower longevity in migratory than in non-migratory species                                                                                                                                                                              | 55                |
|              | period of activity          | diurnal vs. nocturnal; crepuscular species (i.e. active at dawn and dusk) were categorised as nocturnal                                                                                                        | species that are active at night are likely to be harder for predators to detect and predators are more scarce at night thus, nocturnal species might have higher juvenile survival and live longer than diurnal species                                                                                                 | 31                |
| ecological   | nest predation risk*        | based on both most commonly used nest location and nest type; ordinaly ranked: 1 = inaccessible nests in cavities, 2 = open nests in cliffs or tree, 3 = open nest in shrub-layer or the ground <sup>(b)</sup> | nest predation risk may alter the developmental phase of the nestling and the reproductive effort of the parents which may affect juvenile survival and longevity; greater nest predation risk may associate with lower juvenile survival and lower longevity                                                            | 20                |
|              | foraging exposure*          | level of exposure to predators during foraging time based on most commonly used foraging area; ordinaly ranked: 1 = pelagic species, 2 = aerial foragers, 3 = terrestrial foragers                             | pelagic or aerial forager should have lower predation risk and be more capable of escaping from predators than species that feed on the ground; juvenile survival and longevity may be reduced in the latter more than in the formers                                                                                    | 56,57             |
|              | vegetation cover*           | cover of woody vegetation in habitat (%)                                                                                                                                                                       | more open habitats provide less visual cover than habitats dense in vegetation, increasing the risk of being killed; thus, low vegetation density may associate with lower juvenile survival and lower longevity. The reverse may be true if vegetation cover, by obstructing the view of the prey, affects its survival | 57-59             |
|              | caloric content of food*    | energy content of the food in kcal/100g <sup>(c)</sup>                                                                                                                                                         | food calory content can influence the energy available for maintenance; high calory diet may associate with higher juvenile survival and higher longevity                                                                                                                                                                | 60,61             |

|        |                                                                                                                                                                                                                                                            |                                                                                                                                                                                                                                                                                                                             |                   |
|--------|------------------------------------------------------------------------------------------------------------------------------------------------------------------------------------------------------------------------------------------------------------|-----------------------------------------------------------------------------------------------------------------------------------------------------------------------------------------------------------------------------------------------------------------------------------------------------------------------------|-------------------|
|        | fibre food content in g/100g <sup>(c)</sup>                                                                                                                                                                                                                | food fibre content can influence digestion efficiency and thus the level of resource acquired and health; high fibre diet may associate with higher juvenile survival and higher longevity                                                                                                                                  | 60,61             |
|        | fibre content of food*                                                                                                                                                                                                                                     |                                                                                                                                                                                                                                                                                                                             |                   |
|        | level of energy demand for foraging based on most commonly used foraging technics; ordinally ranked: 1 = sit and wait hunters, 2 = swimming or short perch & short flights, 3 = aerial or under water foraging, 4 = terrestrial or gleaners <sup>(d)</sup> | species with highly energetically demanding foraging strategies may have lower juvenile survival and lower longevity than species with less energetically demanding technics                                                                                                                                                | 62                |
|        | foraging cost*                                                                                                                                                                                                                                             |                                                                                                                                                                                                                                                                                                                             |                   |
|        | specialist (only one diet class) vs. generalist (more than one diet class)                                                                                                                                                                                 | a change in the food availability can have higher costs for specialist than generalist species as the later can deviate to other food resources; specialisation may associate with lower juvenile survival and lower longevity                                                                                              | 63                |
|        | diet specialisation                                                                                                                                                                                                                                        |                                                                                                                                                                                                                                                                                                                             |                   |
|        | specialist (only one habitat type) vs. generalist (more than one habitat type) <sup>(e)</sup>                                                                                                                                                              | a change in habitat availability can have higher costs for specialist than generalist species as the latter can occupy other habitat types; specialisation is predicted to associate with lower juvenile survival and lower longevity                                                                                       | 64,65             |
|        | habitat specialisation                                                                                                                                                                                                                                     |                                                                                                                                                                                                                                                                                                                             |                   |
|        | mean duration of the growing season in months <sup>(f)</sup> (i.e., month(s) of the yeuyuar in which temperature and rainfall allow significant plant productivity)                                                                                        | a short growing season implies changes in environmental conditions over the year, thus MGS duration can be seen as a proxy of environmental variability; less variable environments (long growing season) may associate with higher juvenile survival and longevity than highly variable environment (short growing season) | 66                |
|        | MGS duration*                                                                                                                                                                                                                                              |                                                                                                                                                                                                                                                                                                                             |                   |
|        | breeding distribution range: northern or southern hemisphere, both hemispheres, island                                                                                                                                                                     | southern hemisphere and island species may have higher juvenile survival and higher longevity compared to northern hemisphere species                                                                                                                                                                                       | 34,66,67          |
|        | region                                                                                                                                                                                                                                                     |                                                                                                                                                                                                                                                                                                                             |                   |
|        | number of sympatric adult's or independent juveniles' predator species <sup>(g)</sup>                                                                                                                                                                      | a higher number of predators increases the risk of being predated; higher number of predators may associate with a lower juvenile survival and lower longevity                                                                                                                                                              | 32                |
|        | N avian predators*                                                                                                                                                                                                                                         |                                                                                                                                                                                                                                                                                                                             |                   |
| Social | uniparental, biparental, cooperative breeding                                                                                                                                                                                                              | the presence of additional carer can reduce survival risks on young and survival costs on the other carer(s); biparental and cooperative breeding species may have higher juvenile survival and higher longevity than uniparental species                                                                                   | 68, but see 69,70 |
|        | parental care mode                                                                                                                                                                                                                                         |                                                                                                                                                                                                                                                                                                                             |                   |
|        | family living (offspring remain at least 50 days beyond nutritional independence with parents) vs. non-family living <sup>(h)</sup>                                                                                                                        | species with prolonged post-fledging parental care or having a prolonged association with the parents beyond independence, as in family-living species, may have higher juvenile survival and lower longevity                                                                                                               | 45,71             |
|        | social system                                                                                                                                                                                                                                              |                                                                                                                                                                                                                                                                                                                             |                   |

Because experience (e.g., foraging, competition, reproductive strategies, anti-predation behaviours) differs between young individuals (inexperienced) and adults (experienced), we also assumed each of the abovementioned parameters to differentially influence juvenile survival and longevity, and potentially explain variation in juvenile survival/longevity relationships.

\* Included in the PCA (Table 2). The other parameters are categorical variables. (a)<sup>56</sup>, (b)<sup>72,73</sup>, (c)<sup>60</sup>, (d)<sup>74</sup>, (e)<sup>75</sup>, (f)<sup>76</sup>, (g)<sup>32</sup>, (h)<sup>46</sup>.

Table 2 | Results of the Principal Component Analysis (PCA) with varimax rotation on the 12 continuous predictors.

| category     | transformation | variable                          | n° component | life-        | exposure    | food         | nest        | N           | avian       | foraging    | MGS  |
|--------------|----------------|-----------------------------------|--------------|--------------|-------------|--------------|-------------|-------------|-------------|-------------|------|
|              |                |                                   |              | history      | to          | fibre        | predation   | predators   | cost        | duration    |      |
|              |                |                                   |              | pace         | predators   |              | risk        |             |             |             |      |
|              |                |                                   |              | 1            | 7           | 2            | 6           | 3           | 5           | 4           | h2   |
| life-history | ln             | adult body mass                   |              | <b>0.90</b>  | -0.25       | -0.08        | 0.13        | -0.01       | -0.17       | -0.12       | 0.95 |
|              | none           | annual parental investment        |              | <b>-0.89</b> | 0.14        | -0.17        | 0.13        | 0.14        | -0.05       | -0.02       | 0.87 |
|              | sqrt           | incubation period                 |              | <b>0.76</b>  | -0.35       | 0.23         | -0.03       | -0.10       | -0.28       | -0.04       | 0.84 |
|              | none           | nestling period                   |              | 0.51         | 0.04        | 0.44         | -0.58       | -0.13       | 0.01        | 0.20        | 0.85 |
| ecological   | none           | nest predation risk               |              | 0.05         | -0.10       | -0.12        | <b>0.94</b> | -0.12       | 0.09        | -0.07       | 0.93 |
|              | none           | foraging cost                     |              | -0.17        | 0.02        | -0.11        | 0.08        | -0.07       | <b>0.96</b> | -0.05       | 0.98 |
|              | none           | calorie content of food           |              | 0.15         | 0.49        | 0.62         | 0.02        | 0.44        | 0.01        | -0.01       | 0.83 |
|              | ln             | fibre content of food             |              | -0.11        | 0.16        | <b>-0.89</b> | 0.22        | -0.01       | 0.15        | -0.10       | 0.92 |
|              | none           | foraging exposure                 |              | -0.30        | <b>0.86</b> | -0.04        | -0.01       | 0.04        | -0.02       | 0.00        | 0.83 |
|              | sqrt           | vegetation cover                  |              | -0.21        | <b>0.85</b> | -0.01        | -0.13       | -0.08       | 0.05        | 0.11        | 0.80 |
|              | sqrt           | N avian predators                 |              | -0.18        | -0.03       | 0.08         | -0.07       | <b>0.95</b> | -0.05       | 0.00        | 0.95 |
|              | none           | MGS duration                      |              | -0.06        | 0.08        | 0.08         | -0.11       | -0.01       | -0.05       | <b>0.98</b> | 0.99 |
|              |                | SS loadings                       |              | 2.68         | 1.94        | 1.5          | 1.34        | 1.15        | 1.07        | 1.05        |      |
|              |                | cumulative variance explained (%) |              | 22           | 39          | 51           | 62          | 72          | 81          | 89          |      |

We considered coefficients of correlation greater than 0.7 or less than -0.7 to be high loadings (highlighted in bold). h2 is the communality of the 7 components. ln: natural logarithm, sqrt : Square root

**Table 3 | Correlates of juvenile survival and longevity.** Results from phylogenetically controlled linear mixed-effect models testing the influence of key life-history, ecological and social traits on juvenile survival and longevity, respectively.

|                                      |                   | juvenile survival          |                   | longevity           |                   |
|--------------------------------------|-------------------|----------------------------|-------------------|---------------------|-------------------|
|                                      |                   | (first-year survival rate) |                   | (maximum longevity) |                   |
|                                      |                   | estimates*                 | FS <sub>300</sub> | estimates*          | FS <sub>300</sub> |
| (intercept)                          |                   | 0.20                       | 0.02              | <b>-0.70</b>        | <b>1</b>          |
| residual adult body mass (covariate) |                   | -0.02                      | 0                 | 0.03                | 0                 |
| ln (research effort) (covariate)     |                   | <b>-0.14</b>               | <b>1</b>          | <b>0.18</b>         | <b>1</b>          |
| life-history pace PC                 |                   | <b>0.50</b>                | <b>1</b>          | <b>0.42</b>         | <b>1</b>          |
| nest predation risk PC               |                   | <b>0.19</b>                | <b>0.92</b>       | -0.10               | 0                 |
| exposure to predators PC             |                   | -0.17                      | 0                 | <b>-0.22</b>        | <b>0.88</b>       |
| N avian predators PC                 |                   | 0.07                       | 0                 | -0.05               | 0                 |
| MGS duration PC                      |                   | -0.01                      | 0                 | -0.08               | 0                 |
| foraging cost PC                     |                   | -0.14                      | 0                 | -0.06               | 0                 |
| food fibre PC                        |                   | -0.13                      | 0                 | 0.03                | 0                 |
| diet specialisation                  | generalist        | 0.00                       | 0                 | 0.00                | 0                 |
|                                      | specialist        | 0.04                       |                   | -0.07               |                   |
| habitat specialisation               | generalist        | 0.00                       | 0                 | 0.00                | 0                 |
|                                      | specialist        | 0.10                       |                   | -0.11               |                   |
| period of activity                   | diurnal           | 0.00                       | 0                 | 0.00                | 0                 |
|                                      | nocturnal         | 0.31                       |                   | -0.38               |                   |
| sedentariness                        | resident          | 0.00                       | 0                 | 0.00                | 0                 |
|                                      | migratory         | 0.14                       |                   | 0.07                |                   |
| region                               | both              | 0.00                       |                   | 0.00                |                   |
|                                      | island            | -0.32                      | 0                 | -0.12               | 0                 |
|                                      | northern          | 0.39                       |                   | -0.16               |                   |
| chick development mode               | southern          | 0.35                       |                   | -0.21               |                   |
|                                      | non-precocial     | 0.00                       | 0                 | 0.00                | 0                 |
| parental care mode                   | precocial         | -0.10                      |                   | -0.36               |                   |
|                                      | biparental        | 0.00                       |                   | 0.00                |                   |
|                                      | cooperation       | -0.08                      | 0                 | -0.17               | 0                 |
| social system                        | uniparental       | 0.53                       |                   | 0.34                |                   |
|                                      | family-living     | 0.00                       | 0                 | 0.00                | 0                 |
|                                      | non family-living | -0.23                      |                   | -0.25               |                   |

**Bold** estimates correspond to predictors with significant effect.

PC: principal component from Table 2.

FS<sub>300</sub>: frequency of trees for which p-values < 0.05.

\*: reference level of categorical variables have an estimate of 0; estimates reflect difference in slope between the reference level and focal level.

Phylogenetic effect longevity model: likelihood ratio test: LRT = 29.52, df = 1, p < 0.001

Phylogenetic effect juvenile survival model: likelihood ratio test: LRT = 3.33, df = 1, p = 0.07

Figures:

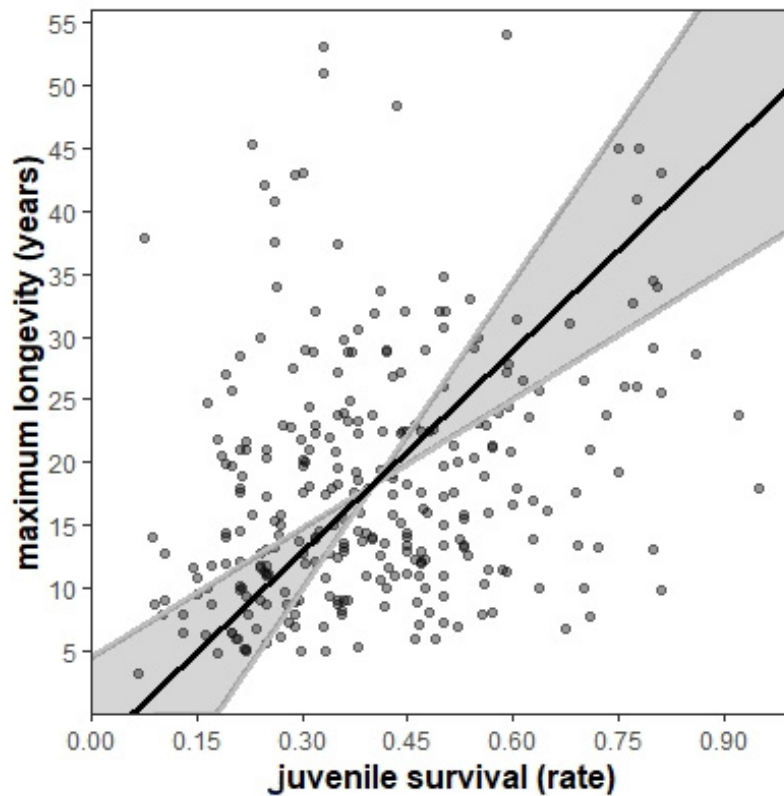

**Figure 1 | Correlation between juvenile survival (first-year survival) and maximum longevity on 293 bird species.**

RMA slope = 53.15, 95% CI (34.13, 81.71);  $r_{\text{Spearman}} = 0.28$ ,  $S = 3003600$ ,  $p < 0.0001$ . 64 species (22%) are inside and 229 (78%) outside the 95%CI of the regression line (shaded area). See Fig. S6 for species identification.



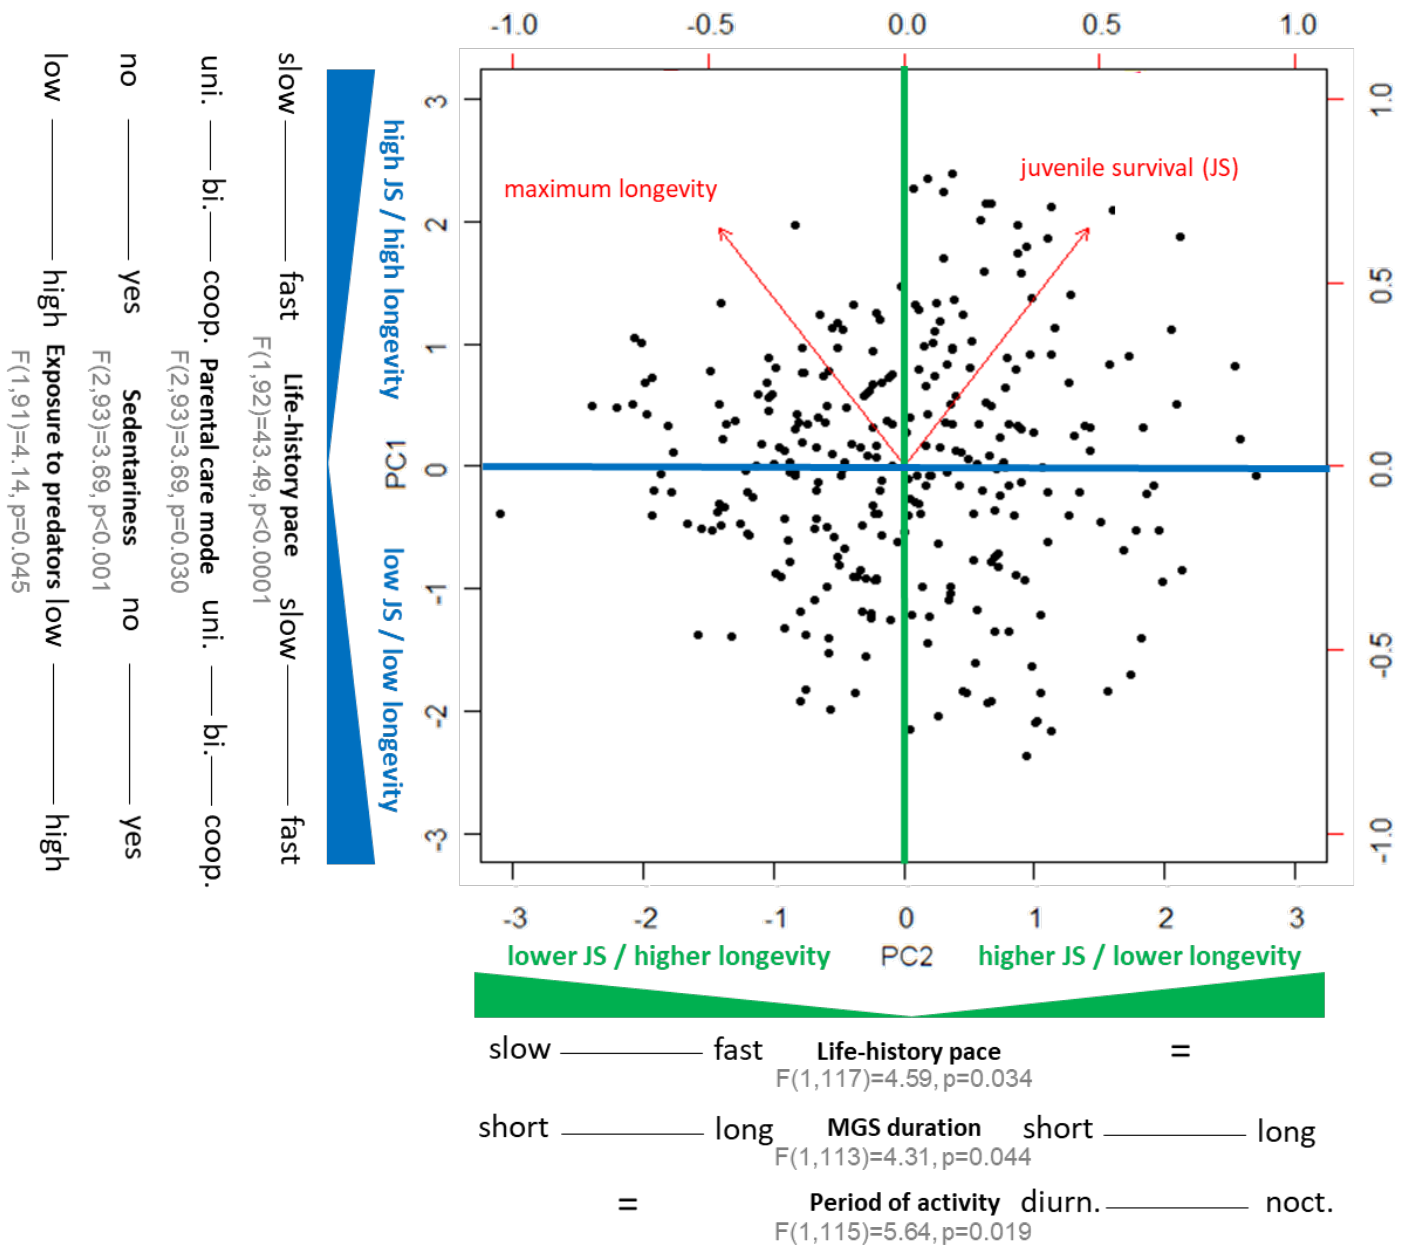

**Figure 2 | Correlates of the positive (PC1) and mismatching (PC2) combinations of juvenile survival and longevity.** Graphical summary of the main results from the backward model selections on phylogenetically controlled linear mixed models investigating which life-history, ecological and social traits characterised species with different combinations of juvenile survival (first-year survival) and longevity (N=204).

The blue axis (PC1) represents combinations that concur with tETA's classical prediction (high juvenile survival associated with high longevity or vice versa). The green axis (PC2) represents combinations that deviate from tETA's classical prediction (deviation towards higher juvenile survival associated with lower longevity or vice versa). Graphics of each independent results are provided in Figs. S8 and S9. See Fig. S10 for species identification and Fig. S11 for order identification.

JS = juvenile survival, Coop. = cooperative breeding, bi. = biparental care, uni. = uniparental care, noct. = nocturnal, diurn. = diurnal, F(.,.,.) = Conditional F statistic and its degrees of freedoms averaged over the 300 models, p = averaged p value over the 300 models.
